# Supplementary material for: Synergistic effect of hydrophobic and hydrogen bonding interaction-driven viologen–pyranine charge-transfer aggregates: adenosine monophosphate recognition
Source: Royal Society of Chemistry journal article supplement (doi:10.1039/d0sm01641a), 2020-11-17
Supplement: d0sm01641a1.pdf [file d0sm01641a1.pdf]

## Supporting Information

### Synergistic Effect of Hydrophobic and Hydrogen Bonding Interactions-Driven Viologen-Pyranine Charge-Transfer Aggregates: Adenosine Monophosphate Recognition

Redhills L. Narendran, ArchitaPatnaik\*

Department of Chemistry, IIT Madras, Chennai – 600036, India

Email: archita@iitm.ac.in

| <b><u>Contents</u></b>                                                                                                             | <b>Page No.</b> |
|------------------------------------------------------------------------------------------------------------------------------------|-----------------|
| <b>1. Figure S1 – S12:</b> NMR spectra of precursor and viologen derivatives V1 to V5.                                             | 2 – 7           |
| <b>2. Figure S13:</b> Synthetic Scheme of viologen derivatives V6 and V7.                                                          | 8               |
| <b>3. Figure S14-S17:</b> NMR spectra of viologen derivatives V6 and V7.                                                           | 8-10            |
| <b>4. Figure S18:</b> Photographs of [V2-Pyr] and [V4-Pyr] CT aggregates in aqueous medium.                                        | 11              |
| <b>5. Figure S19:</b> Visual appearance of viologen derivatives, pyranine and the corresponding CT aggregates after vacuum drying. | 11              |
| <b>6. Figure S20:</b> PXRD spectral pattern of CT aggregates.                                                                      | 12              |
| <b>7. Figure S21 and S22:</b> TG-DTA analysis of precursors and the CT aggregates                                                  | 13-14           |
| <b>8. Table S1 – S4:</b> CHN analysis data of various CT aggregates.                                                               | 15              |
| <b>9. Figure S23:</b> pH dependent absorption spectra of viologens and pyranine.                                                   | 16              |
| <b>10. Figure S24:</b> Absorption spectra of [V3-Pyr] CT complex and Mie scattering.                                               | 16              |
| <b>11. Figure S25:</b> <sup>1</sup> H NMR titration of V4 with pyranine.                                                           | 17              |
| <b>12. Figure S26:</b> Scheme depicting redox reaction of viologens.                                                               | 17              |
| <b>13. Figure S27:</b> IR Spectra of V1, pyranine and [V1-Pyr] aggregates                                                          | 18              |
| <b>14. Figure S28:</b> IR Spectra of V2, pyranine and [V2-Pyr] aggregates                                                          | 18              |
| <b>15. Figure S29:</b> SEM images of viologen derivatives and CT complexes.                                                        | 19              |
| <b>16. Figure S30:</b> Visual appearance of disaggregation induced AMP sensing.                                                    | 20              |
| <b>17. Figure S31:</b> AMP recognition in HEPES buffer.                                                                            | 21              |

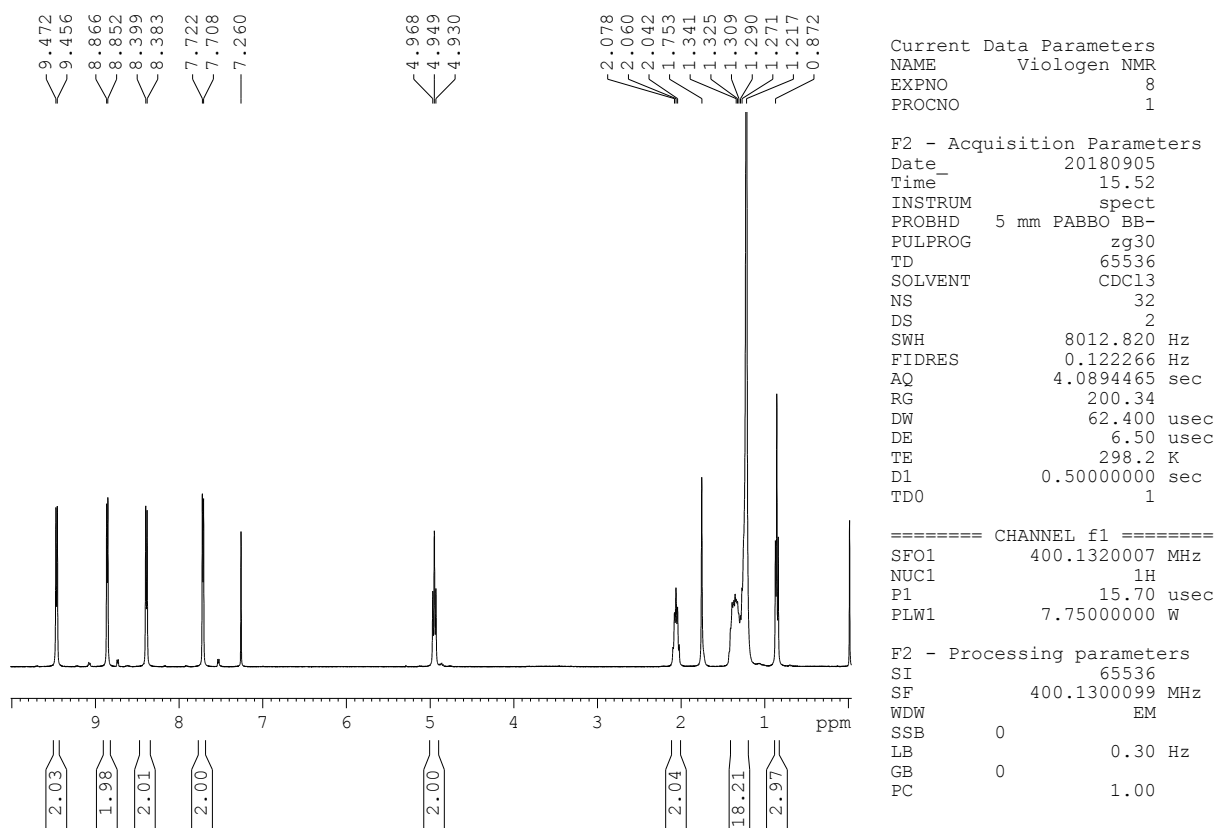

Figure S1: <sup>1</sup>H NMR spectrum of compound 1

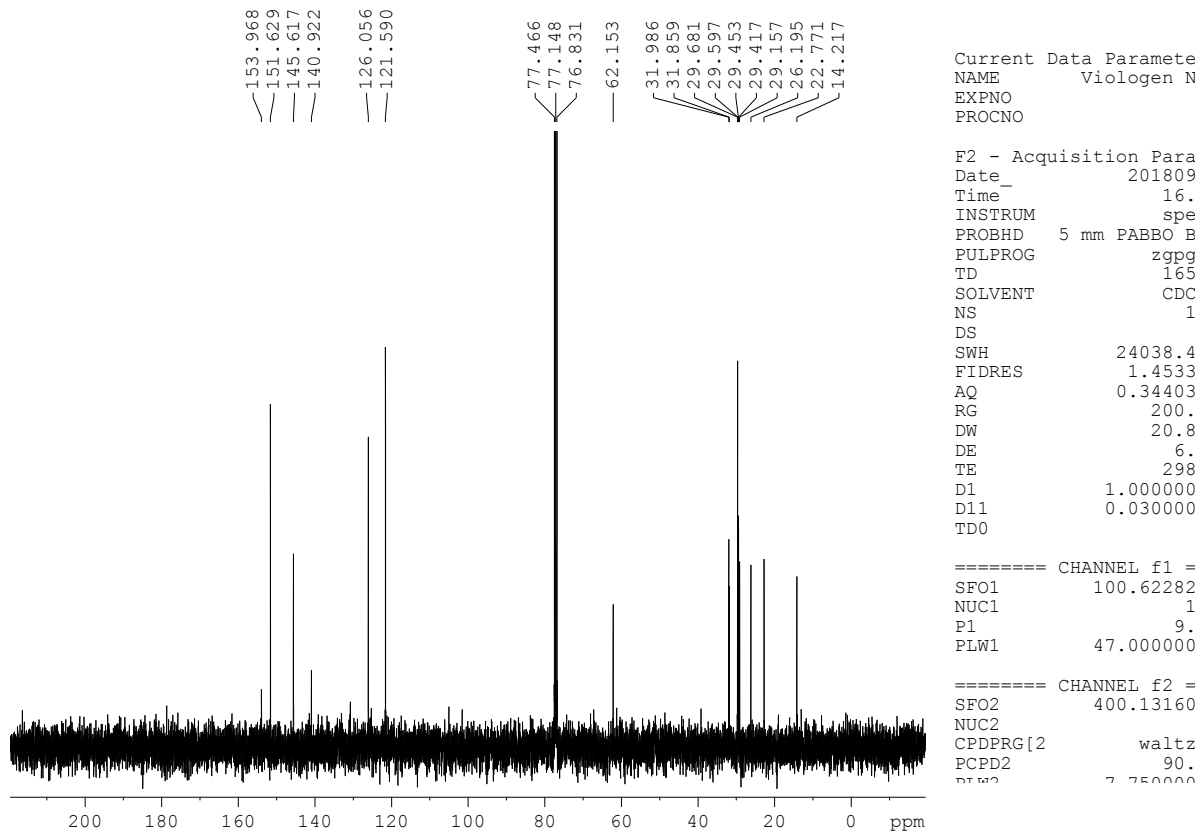

Figure S2: <sup>13</sup>C NMR spectrum of compound 1

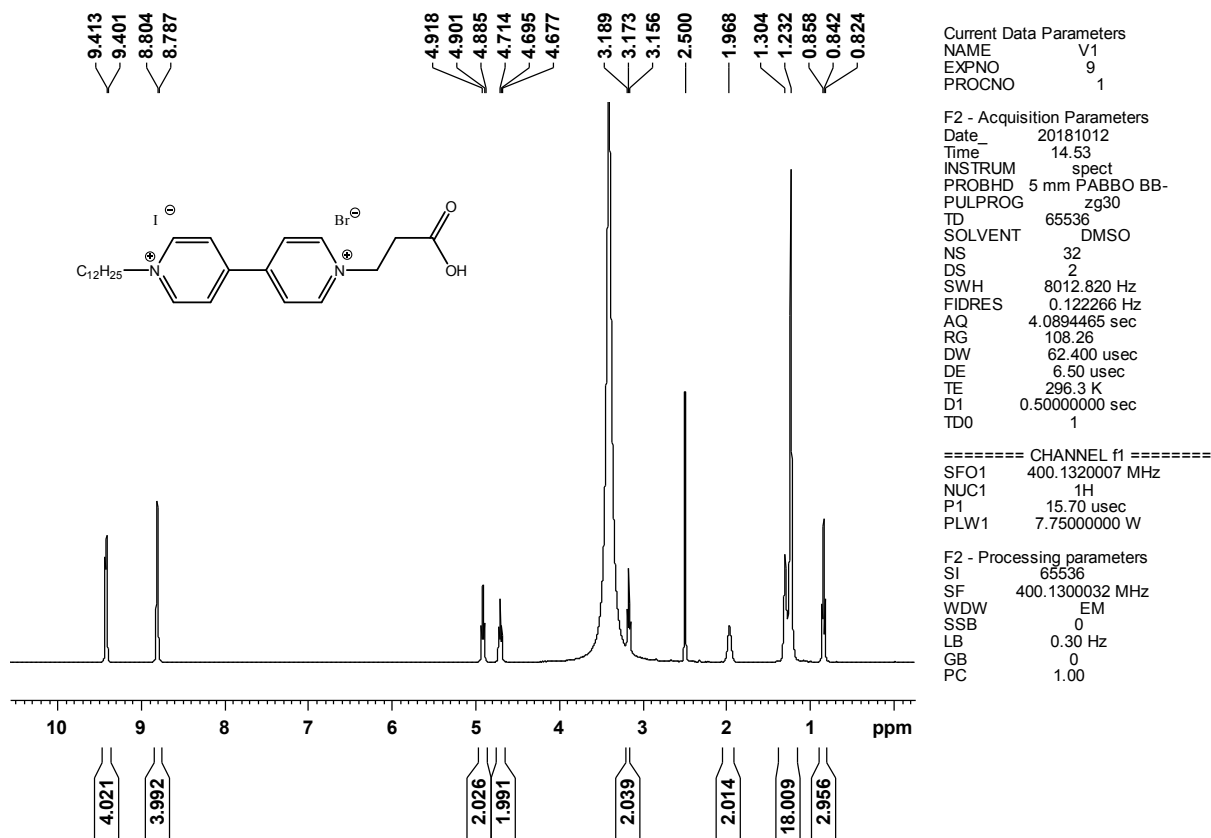

Figure S3: <sup>1</sup>H NMR spectrum of V1

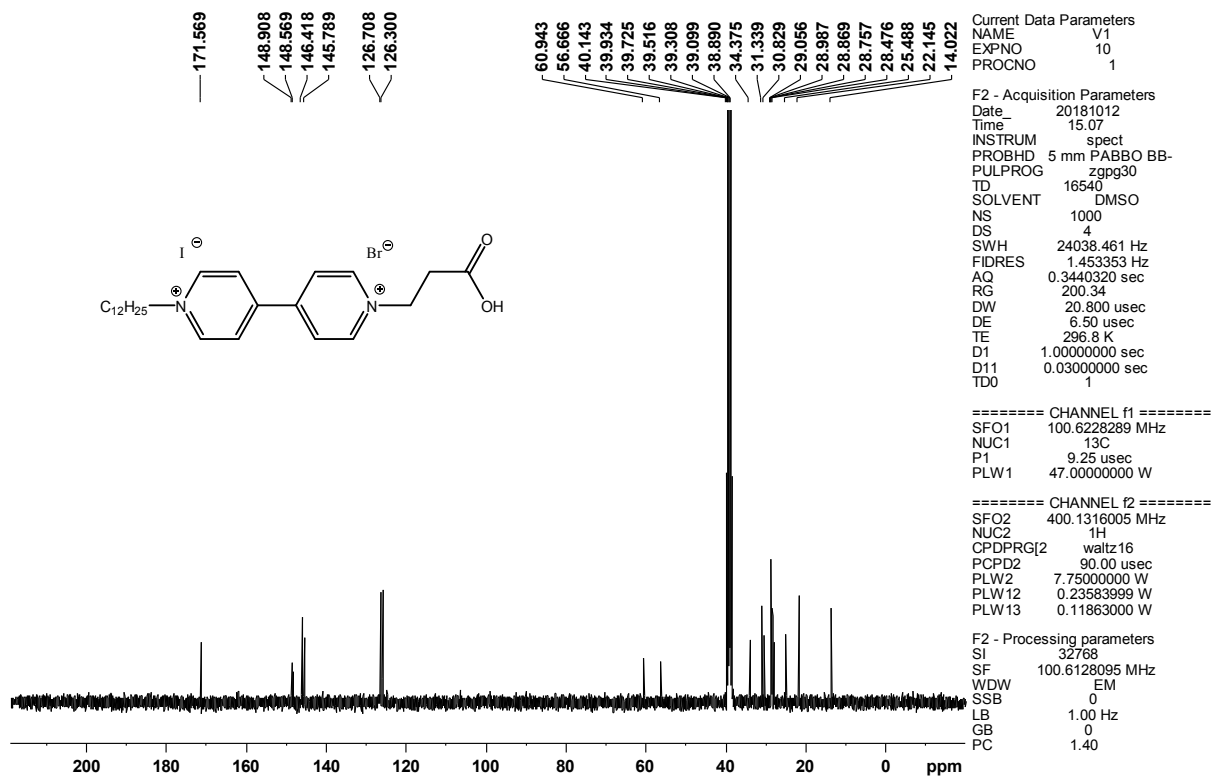

Figure S4: <sup>13</sup>C NMR spectrum of V1

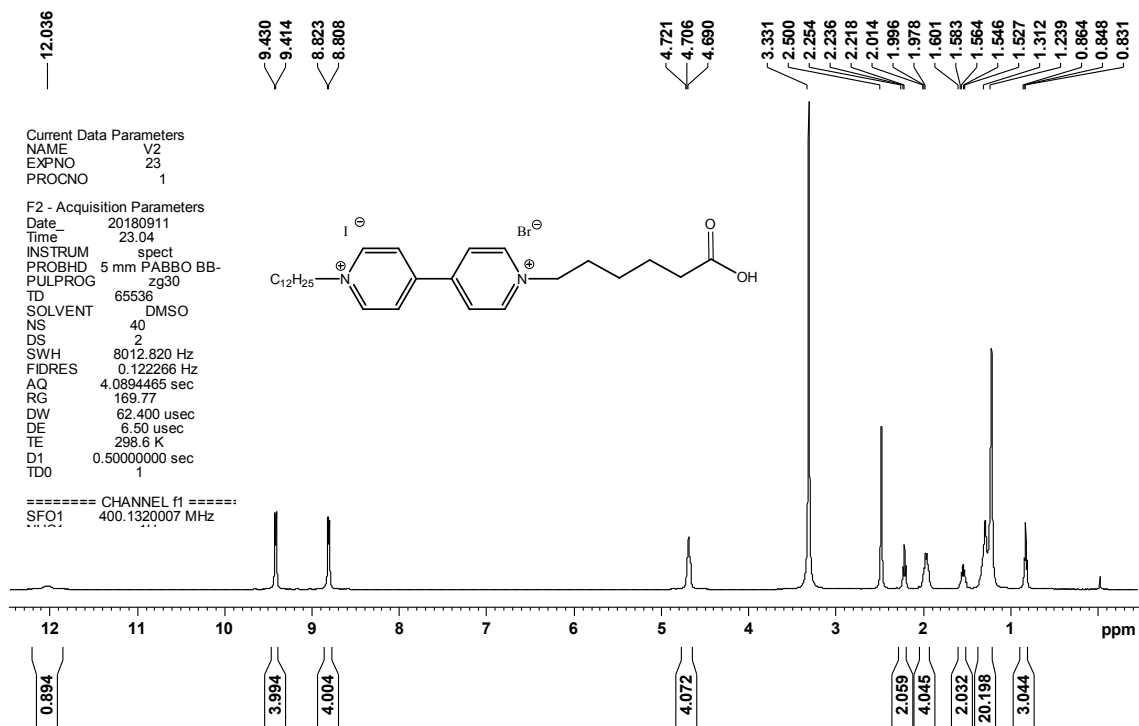

re S5: <sup>1</sup>H NMR spectrum of V2

Fig

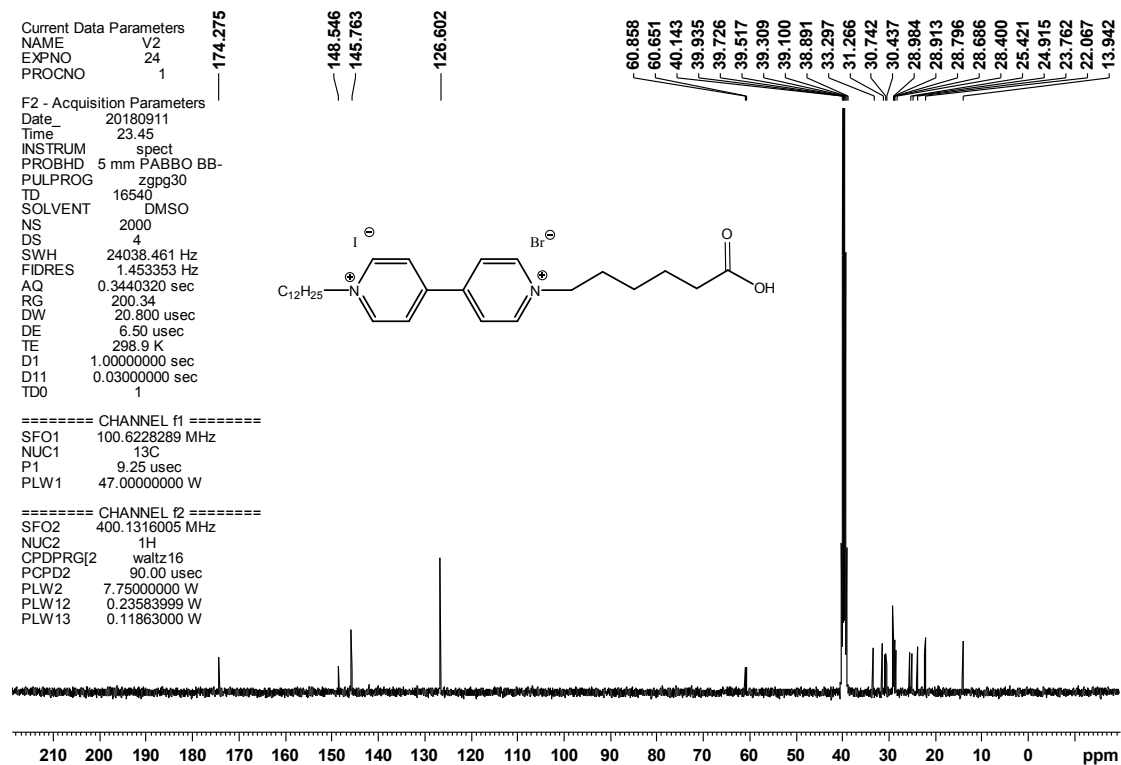

Figure S6: <sup>13</sup>C NMR spectrum of V2

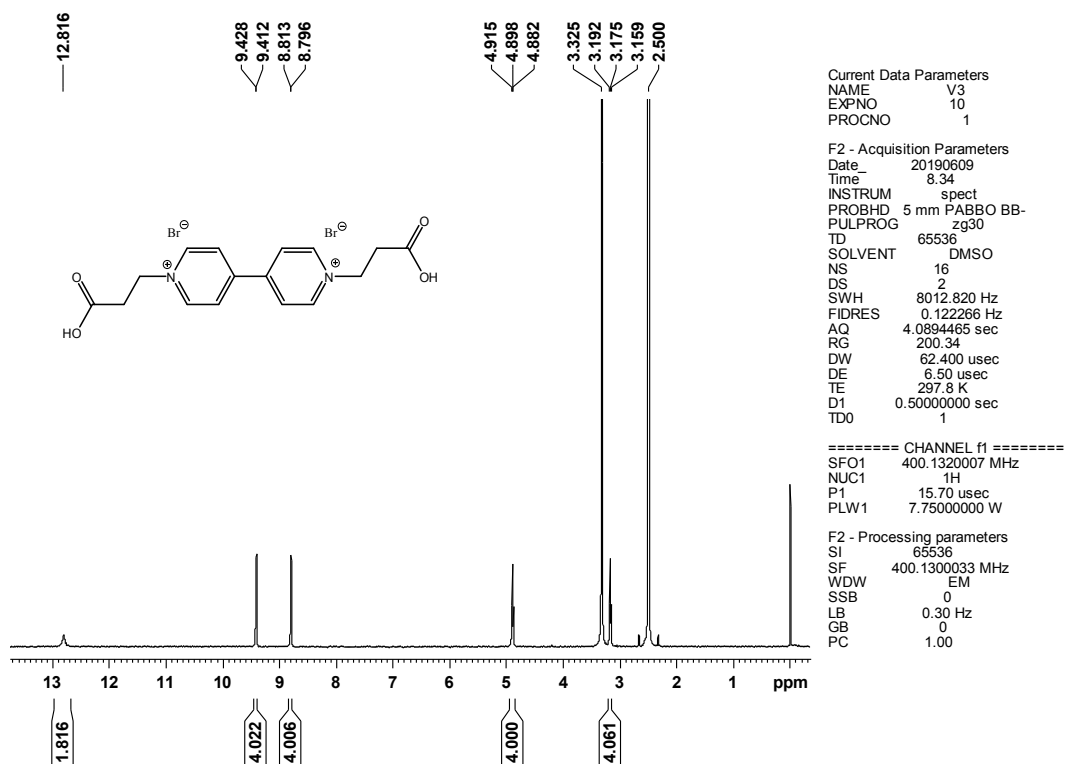

Figure S7: <sup>1</sup>H NMR spectrum of V3

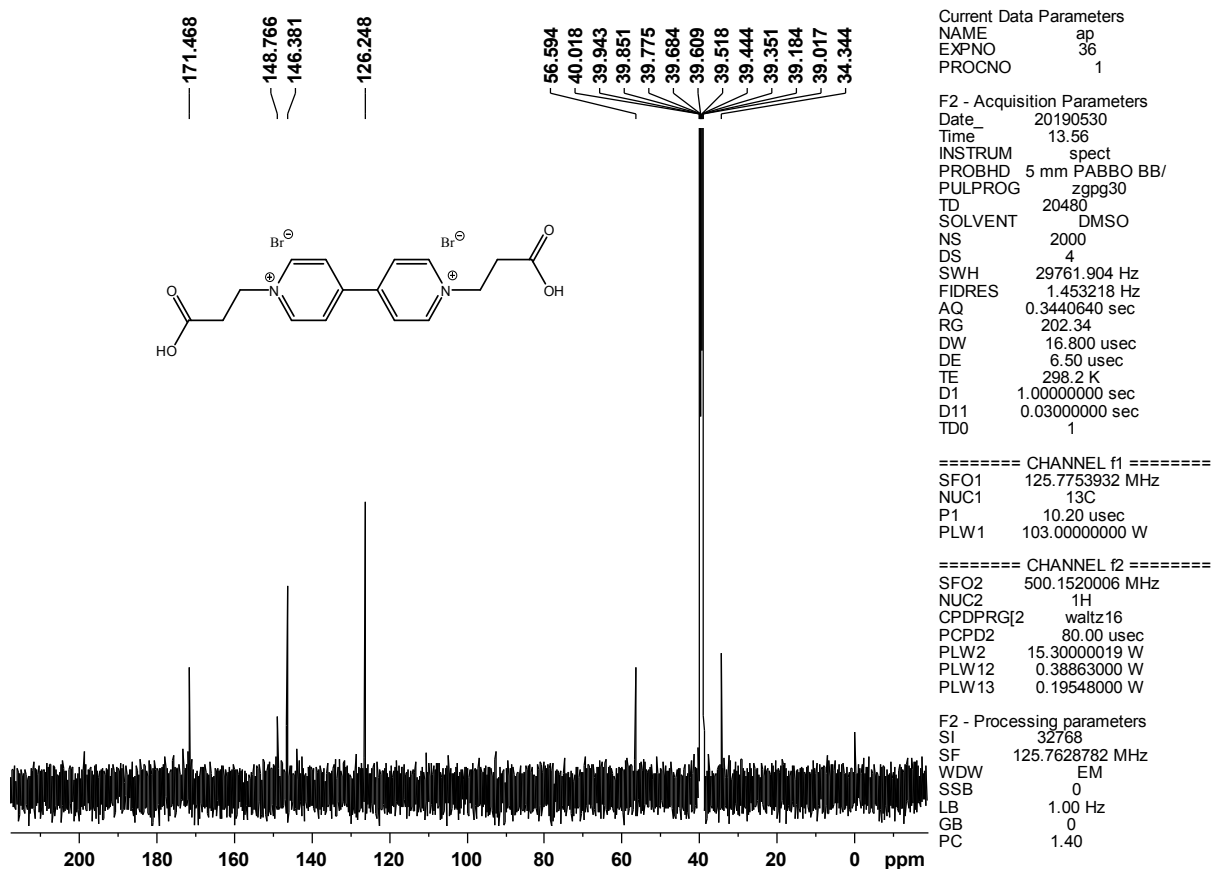

Figure S8: <sup>13</sup>C NMR spectrum of V3

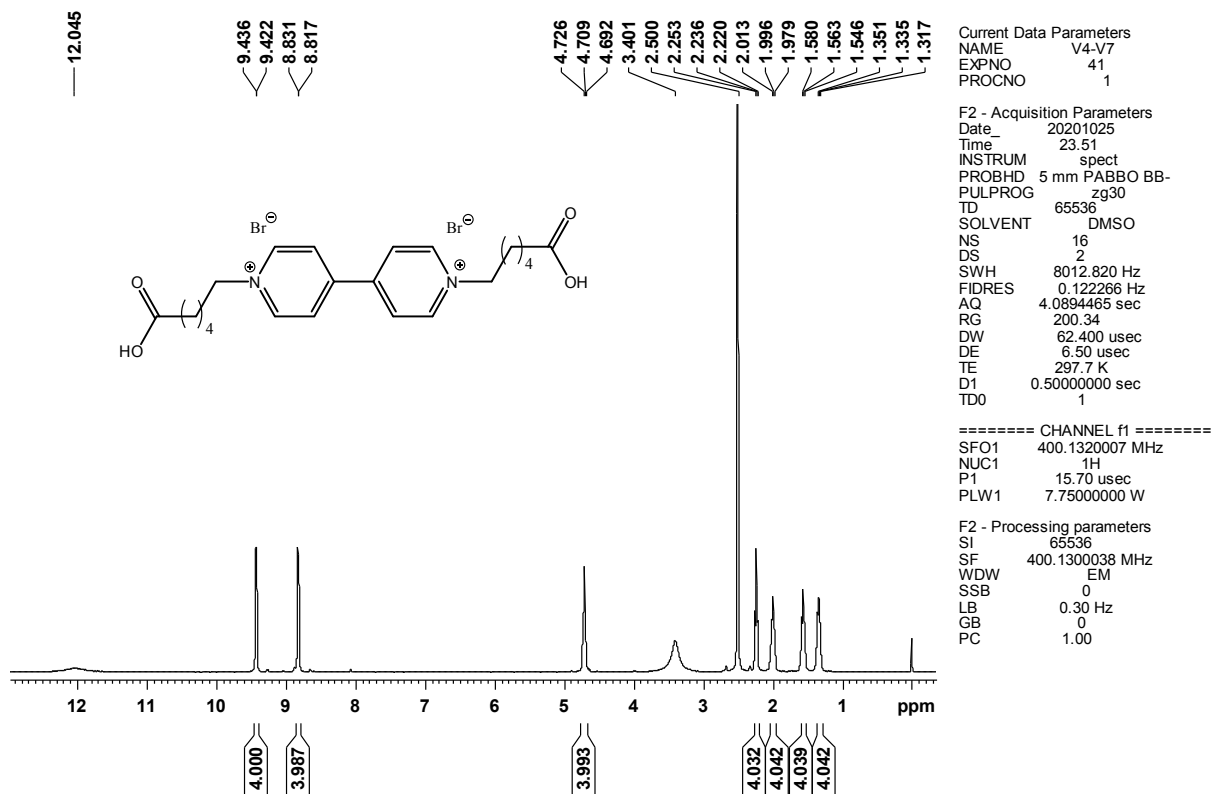

Figure S9: <sup>1</sup>H NMR spectrum of V4

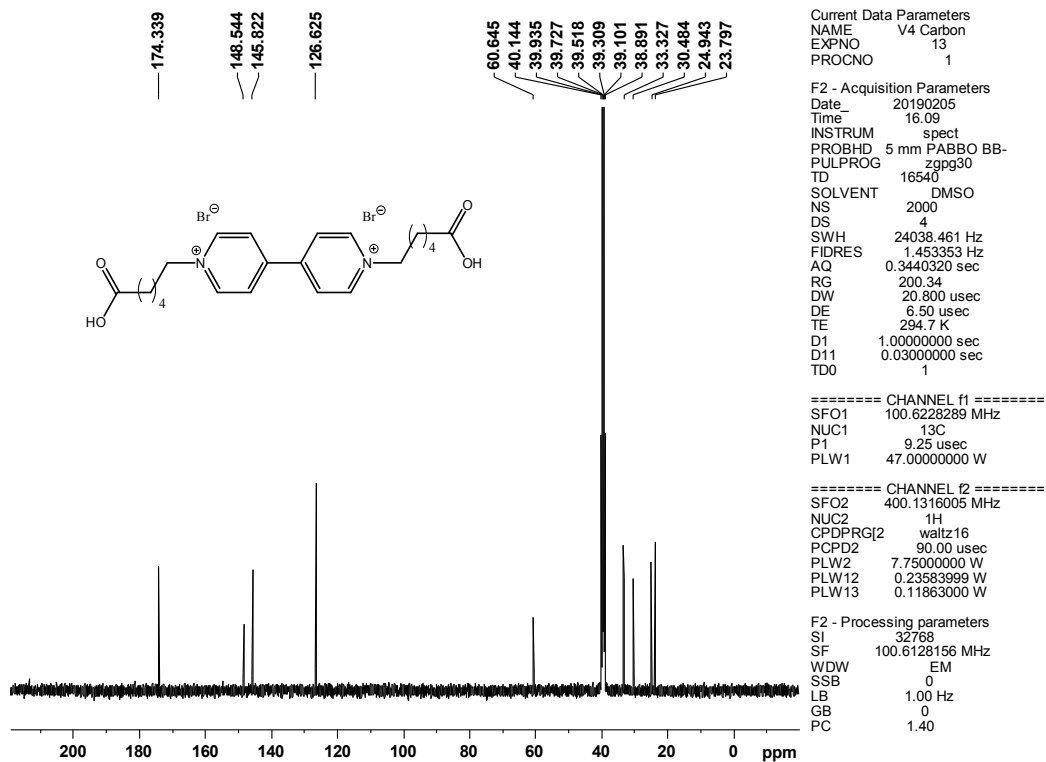

Figure S10: <sup>13</sup>C NMR spectrum of V4

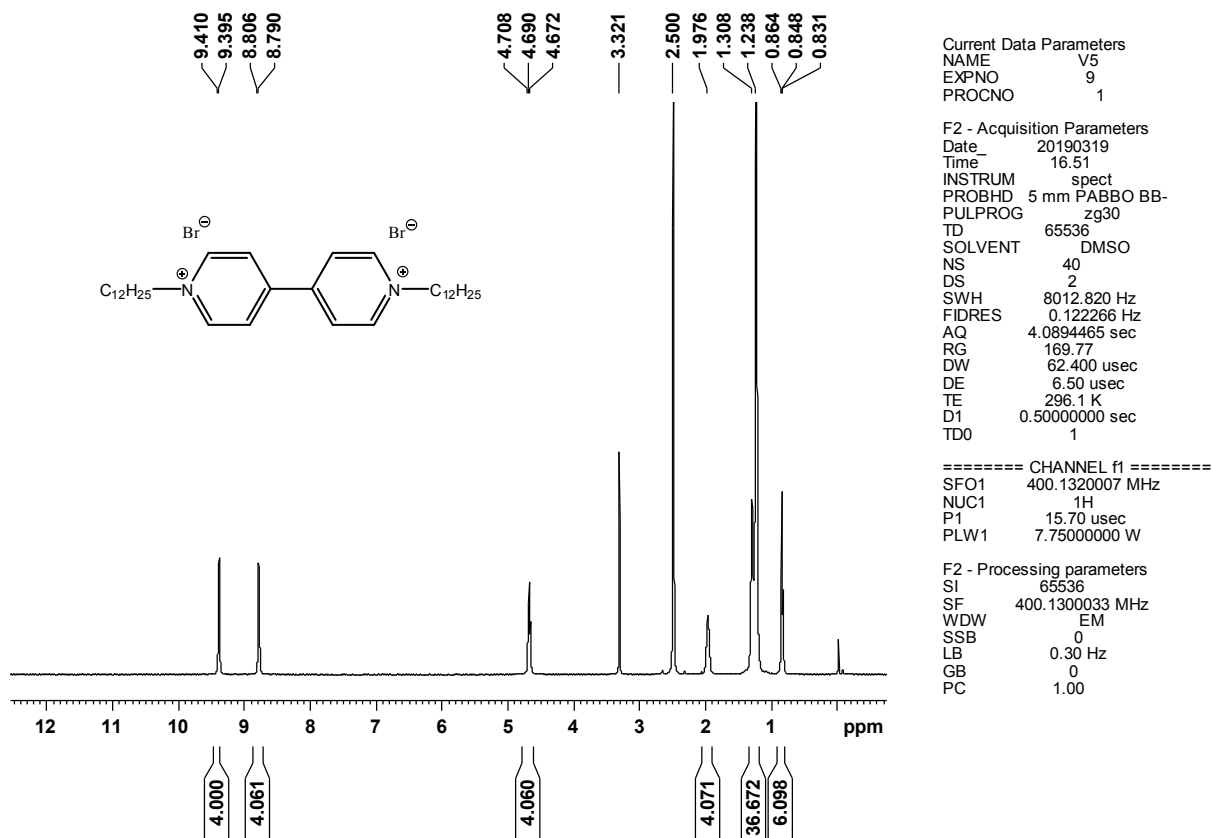

Figure S11: <sup>1</sup>H NMR spectrum of V5

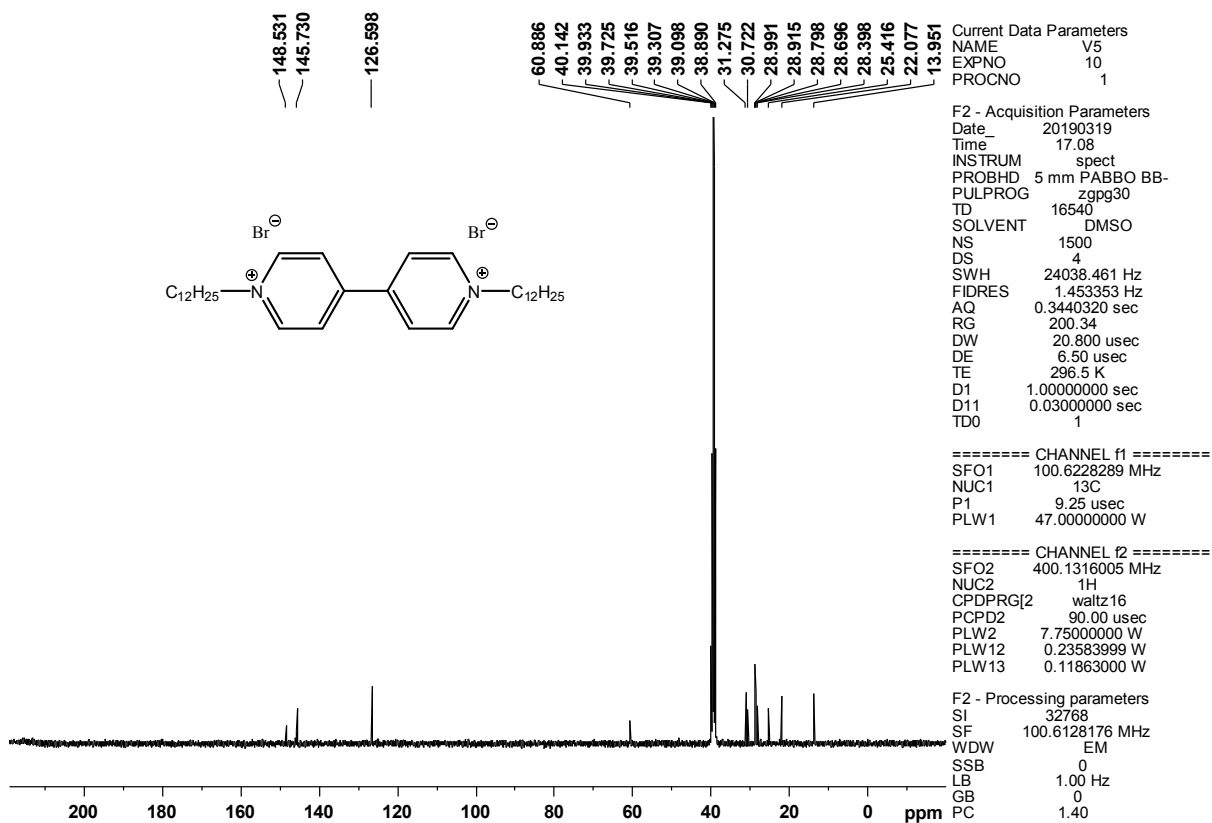

Figure S12: <sup>13</sup>C NMR spectrum of V5

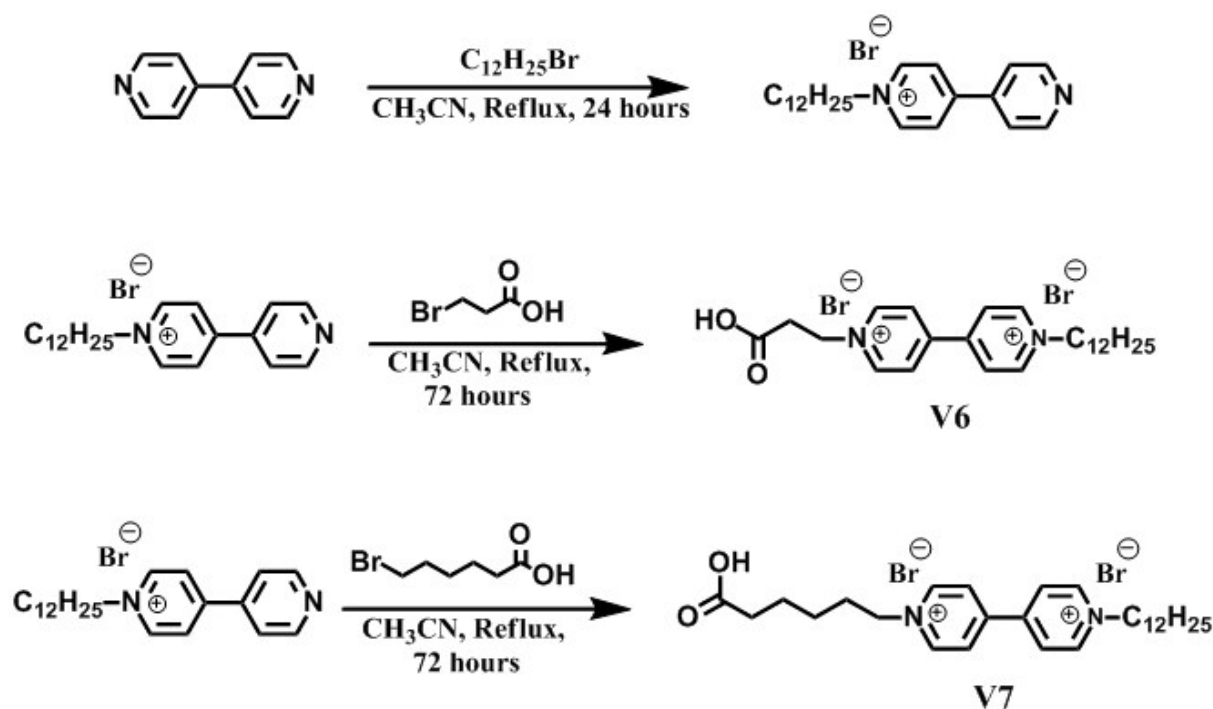

**Figure S13** Synthetic scheme for viologen derivatives V6 and V7

V6 and V7 are synthesized by reacting 1-dodecyl-4-(4-pyridyl)pyridiniumbromide with 3-bromopropionic acid and 6-bromohexanoic acid (Figure S13) according to the procedure adopted for synthesizing V1 and V2.

**V6 NMR:**  $^1\text{H}$  NMR (400 MHz, DMSO- $d_6$ , 25°C):  $\delta$  = 12.76 (broad singlet), 9.42-9.34 (t, 4H), 8.81-8.79 (d, 4H), 4.92-4.89 (t, 2H), 4.71-4.68 (t, 2H), 3.19-3.16 (t, 2H), 1.99-1.96 (t, 2H), 1.31-1.24 (m, 18H), 0.87-0.84 (t, 3H)  $^{13}\text{C}$  NMR (125 MHz, DMSO- $d_6$ , 25°C):  $\delta$  = 171.5, 148.8, 148.5, 146.4, 145.8, 126.6, 126.2, 60.9, 56.6, 34.3, 31.3, 30.8, 29.0, 28.9, 28.8, 28.7, 28.4, 25.4, 22.1, 13.9. ESI-HRMS: calculated for  $\text{C}_{25}\text{H}_{38}\text{Br}_2\text{N}_2\text{O}_2$  556.1290; found  $m/z$  559.1264 ( $\text{M}+\text{H}$ ) $^+$ , 581.1189 ( $\text{M}+\text{Na}$ ) $^+$ .

**V7 NMR:**  $^1\text{H}$  NMR (500 MHz, DMSO- $d_6$ , 25°C):  $\delta$  = 12.05 (broad singlet), 9.41-9.40 (d, 4H), 8.81-8.79 (d, 4H), 4.71-4.67 (m, 4H), 2.25-2.22 (t, 2H), 2.02-1.96 (q, 4H), 1.59-1.53 (q, 4H), 1.36-1.23 (m, 20H), 0.86-0.84 (t, 3H)  $^{13}\text{C}$  NMR (125 MHz, DMSO- $d_6$ , 25°C):  $\delta$  = 174.3, 148.6, 145.8, 126.6, 60.9, 60.7, 33.3, 31.3, 30.8, 30.5, 29.0, 28.9, 28.8, 28.7, 28.4, 25.4, 24.9, 23.8, 22.1, 14.0. ESI-HRMS: calculated for  $\text{C}_{28}\text{H}_{44}\text{Br}_2\text{N}_2\text{O}_2$  598.1761; found  $m/z$  621.1663 ( $\text{M}+\text{Na}$ ) $^+$ .



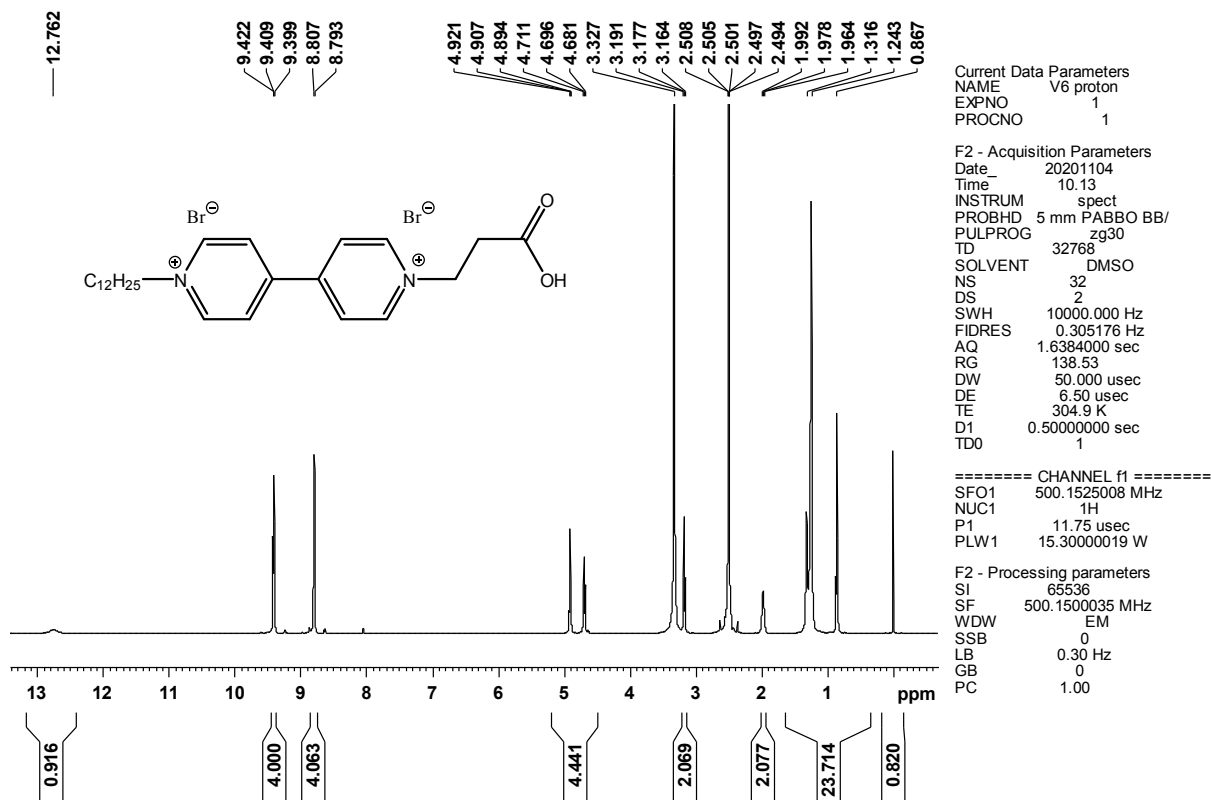

Figure S14: <sup>1</sup>H NMR Spectrum of V6

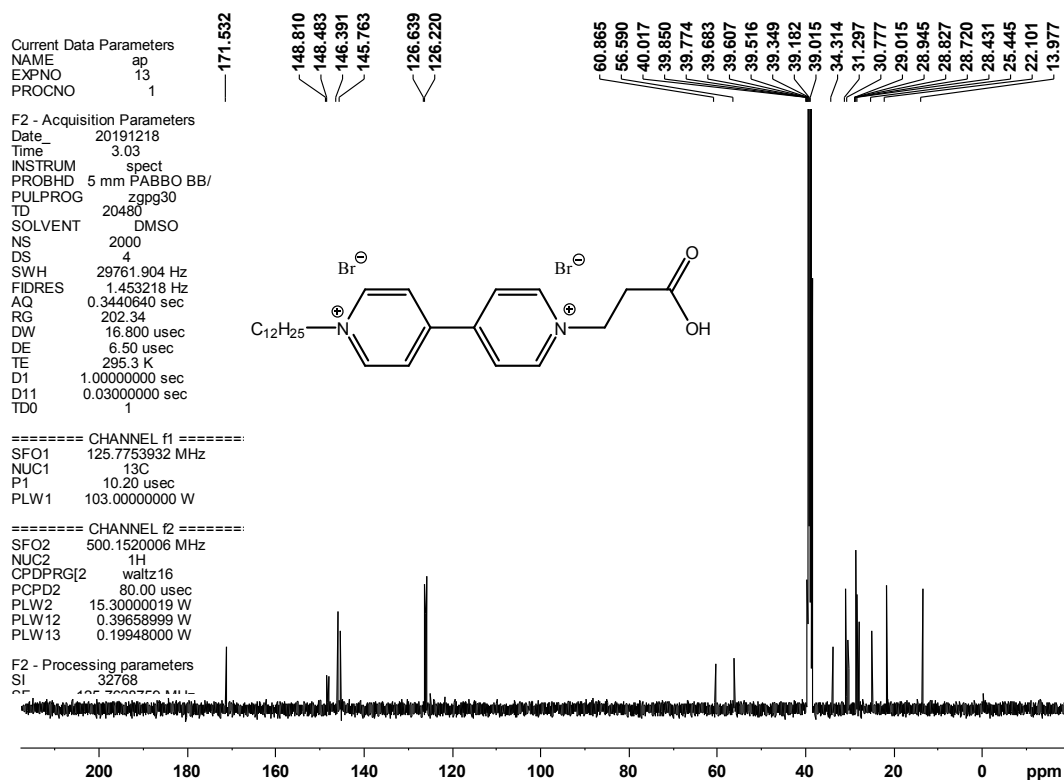

Figure S15: <sup>13</sup>C NMR Spectrum of V6

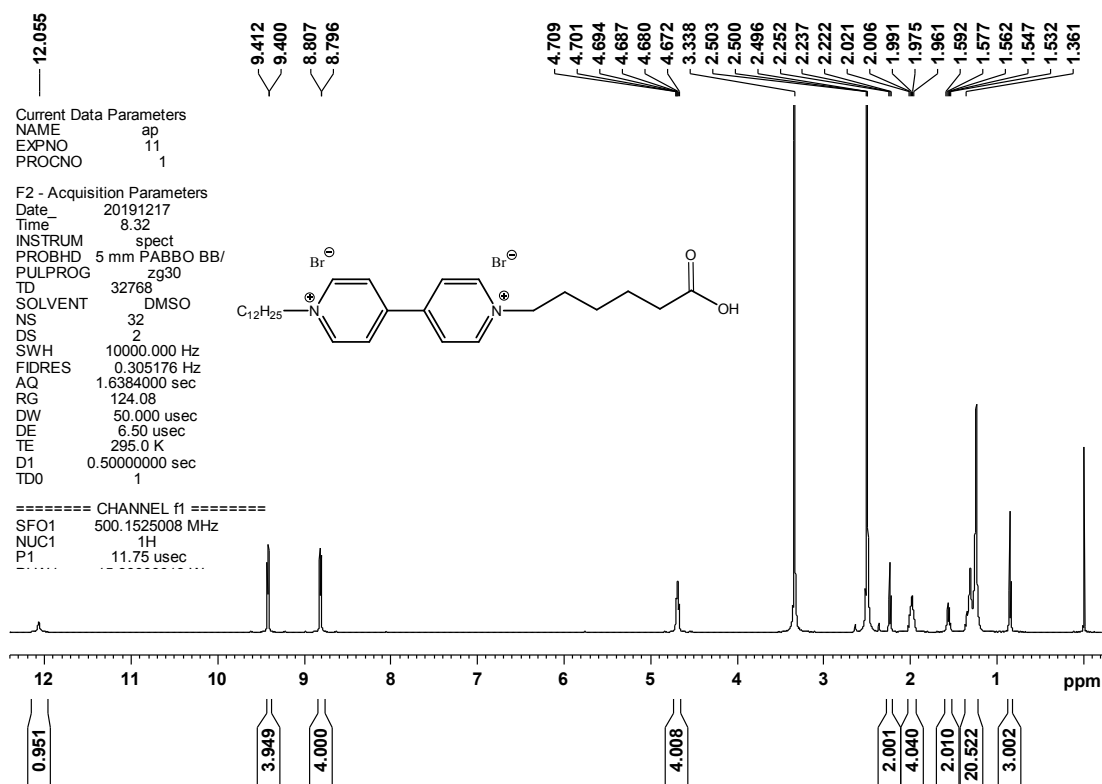

Figure S16: <sup>1</sup>H NMR Spectrum of V7

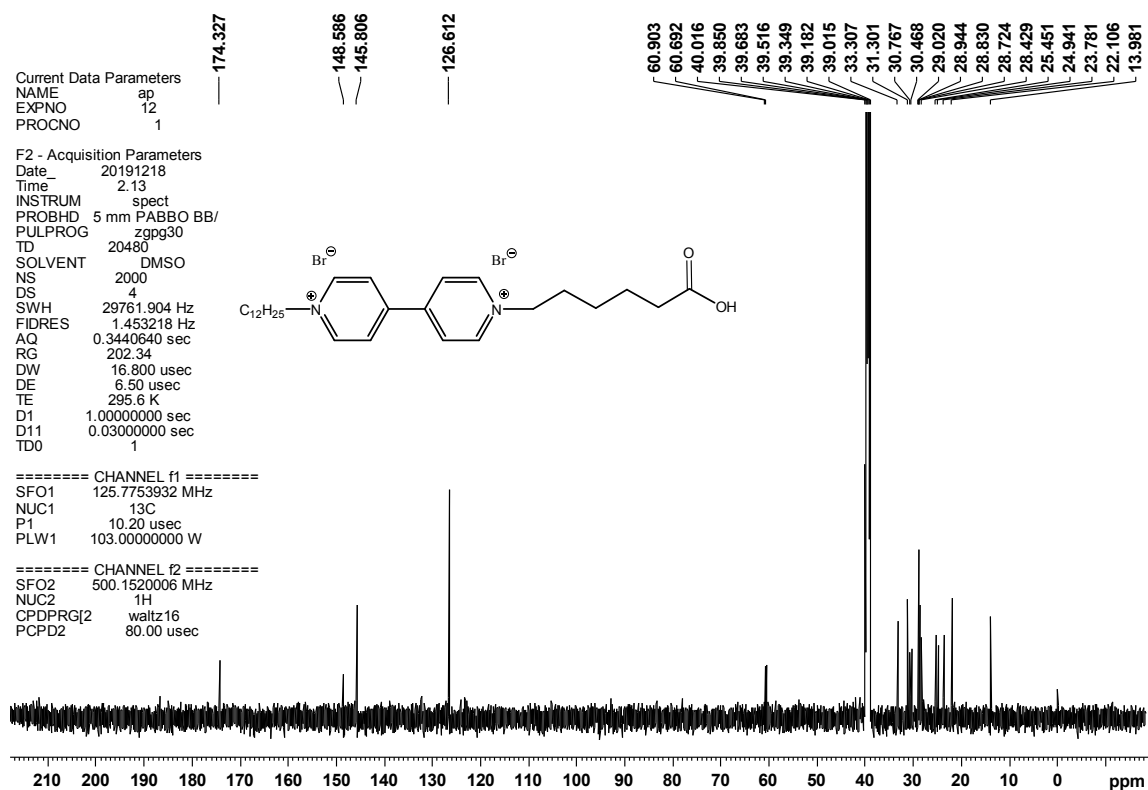

Figure S17: <sup>13</sup>C NMR Spectrum of V7

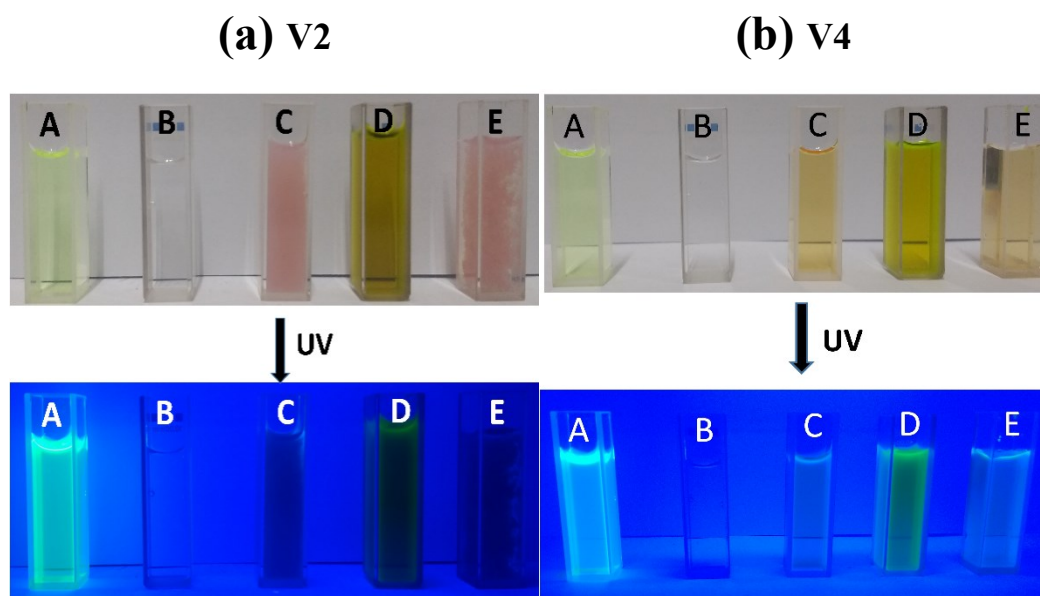

**Figure S18 (a)** Photographs of [V2-Pyr] and [V4-Pyr] CT aggregates in aqueous medium. A: Pyranine; B: V2; C: V2-Pyranine complex; D: V2-Pyranine complex + 20 $\mu$ L of 1M NaOH; E: D + 20  $\mu$ L of 1M HCl; (b)A: Pyranine; B: V4; C: V4-Pyranine complex; D: V4-Pyranine complex + 20 $\mu$ L of 1M NaOH; E: D + 20  $\mu$ L of 1M HCl; (*Top* – Photographs of aqueous solutions and suspensions taken under room light; *Bottom* – Photographs of aqueous solutions and suspensions taken under UV irradiation at 365 nm)

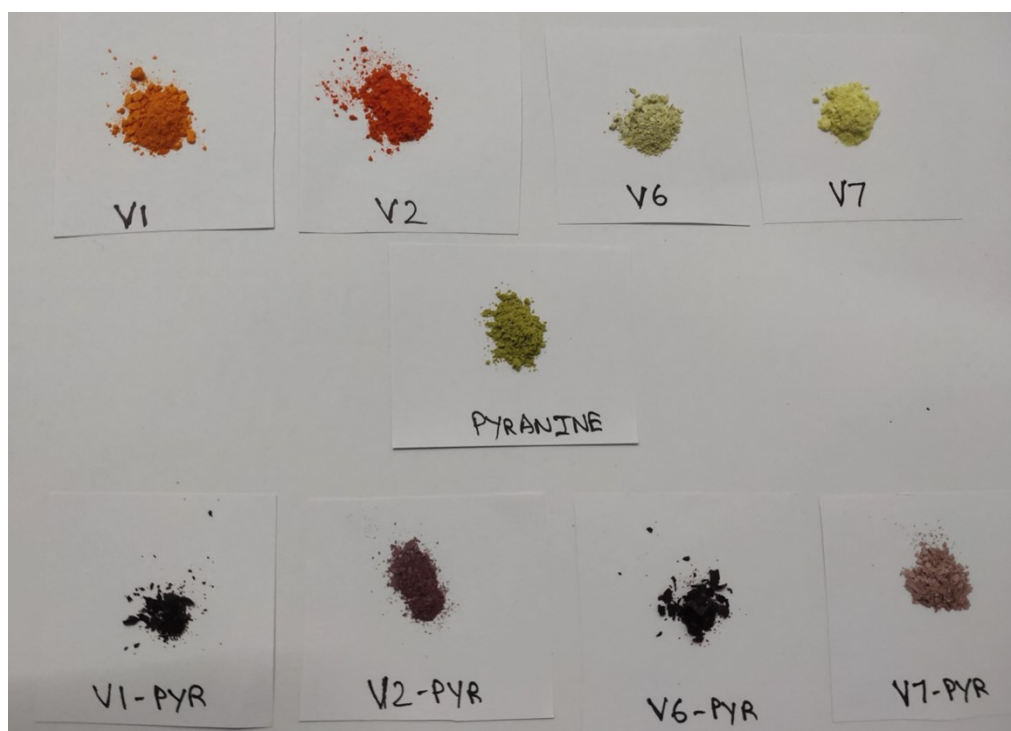

**Figure S19:** Visual appearance of the viologen derivatives, pyranine and the corresponding CT aggregates after vacuum drying.

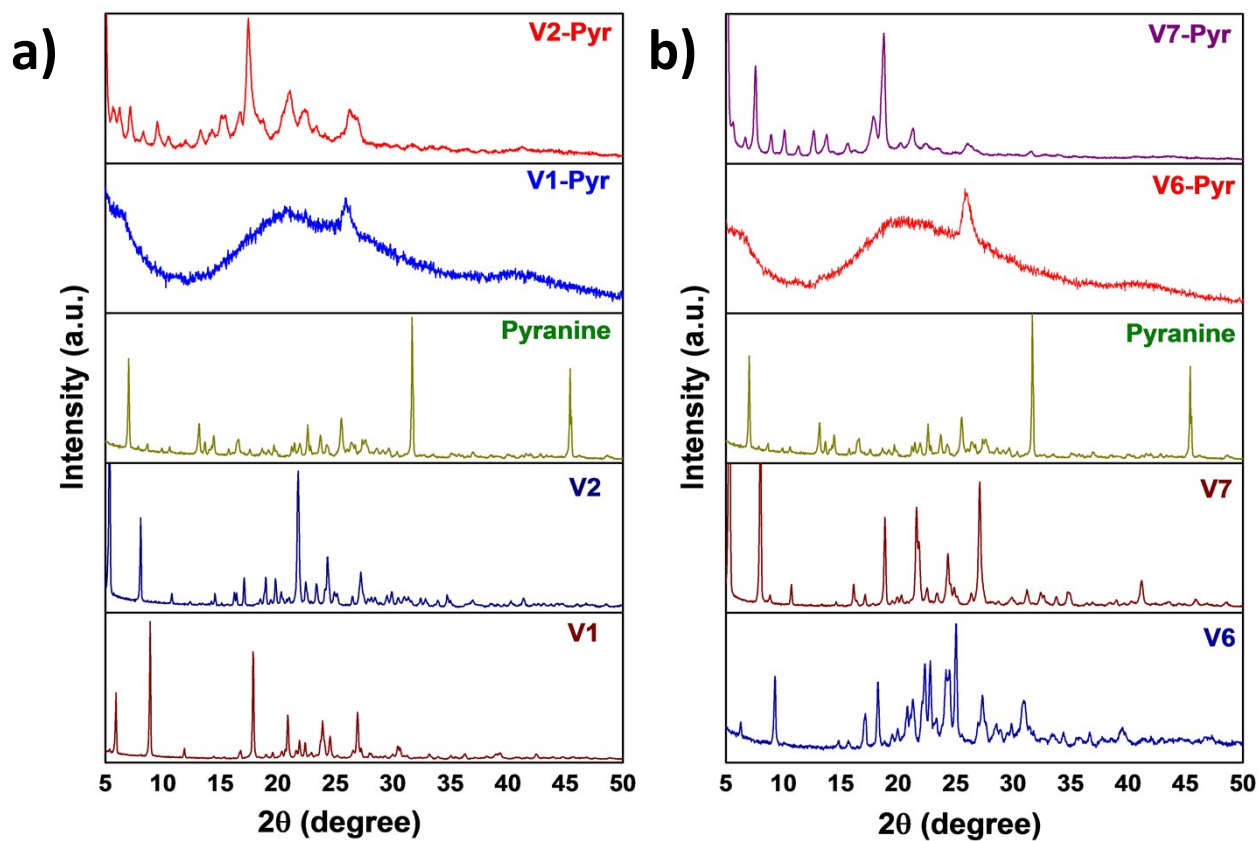

**Figure S20** (a) PXR D spectral patterns of V1, V2, Pyranine, [V1-Pyr] and [V2-Pyr] complexes. (b) PXR D patterns of V6, V7, Pyranine and [V6-Pyr] and [V7-Pyr] complexes.

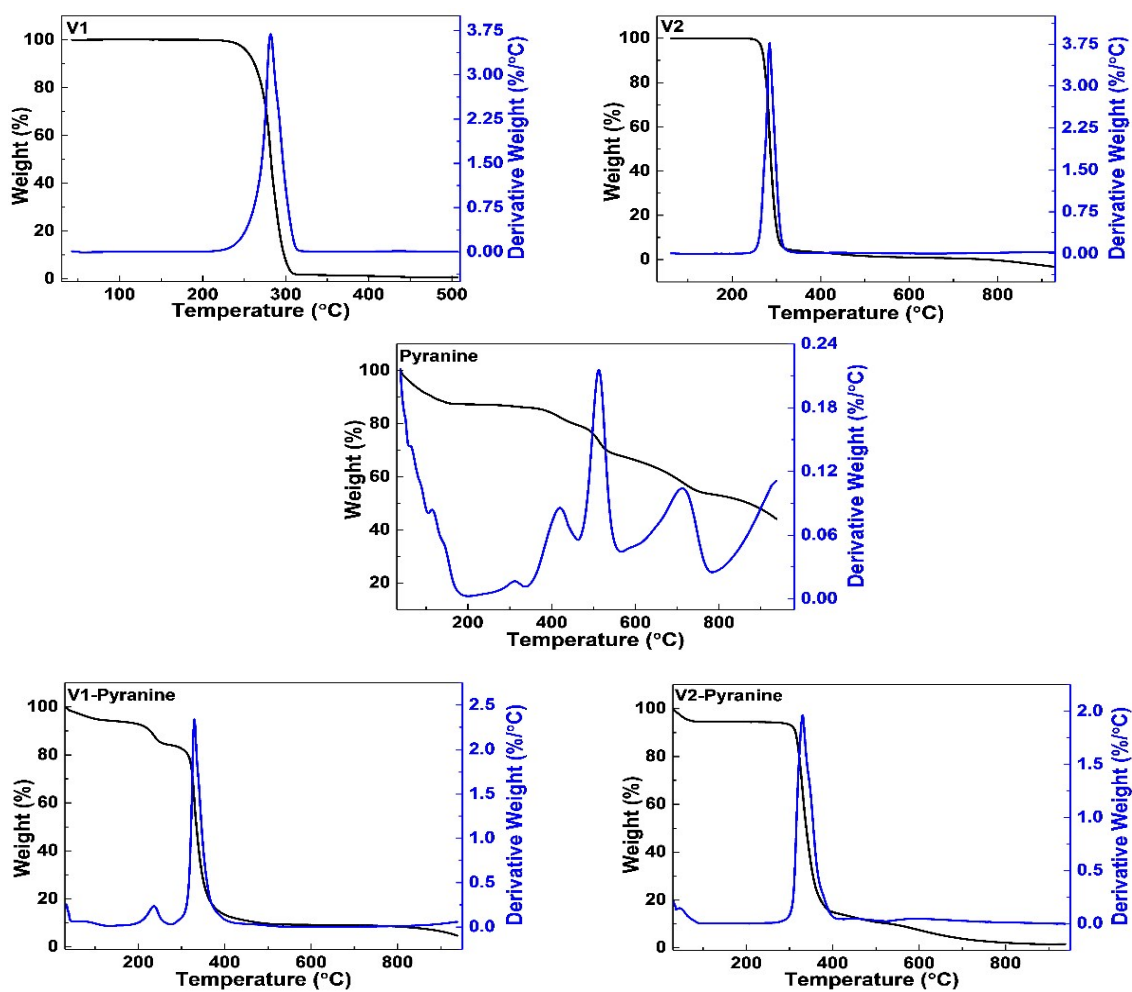

**Figure S21.** TG-DTA analysis of of V1, V2, Pyranine, and their charge transfer complexes [V1-Pyr] and [V2-Pyr].

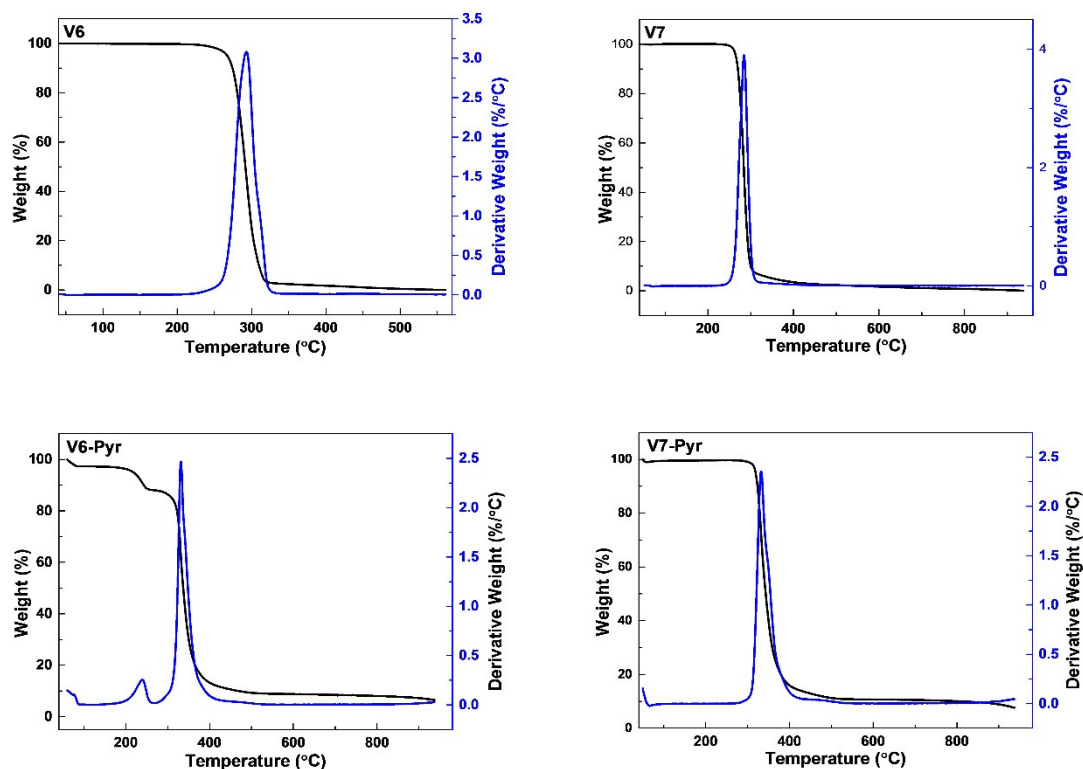

**Figure S22.** TG-DTA analysis of V6, V7, Pyranine, and their charge transfer complexes [V6-Pyr] and [V7-Pyr].

Both V1 and V2 exhibited single stage decomposition within temperature ranges of 235°C to 313°C and 253°C to 339.69°C (Figure S17). Within 340°C, V1 decomposed upto 98% of its weight and V2 decomposed upto 95% of its initial weight. Pyranine exhibited incomplete decomposition upto 44% of its initial weight upto 937°C. In stark contrast to the precursors, [V1-Pyr] CT aggregate exhibited four stages of decomposition; 6% weight loss from 93 to 99°C (loss of adsorbed moisture), 10% weight loss from 189 to 286° C, a major step of decomposition amounting to 72% weight loss around 298°C to 431°C. Ultimately, a 6% weight loss from 431°C to 921°C was seen leaving behind a residue of less than 6% of its initial weight. On the other hand, [V2-Pyr] exhibited three stages of decomposition, the first one amounting to the loss of adsorbed moisture (6%) upto 183°C and a major step of decomposition amounting to 79% from 295.81°C to 405°C. The remaining 15% of residual material decomposed from 405°C to 921°C leaving behind a residue of less than 1.5%. TG-DTA data of viologens V6, V7 and their corresponding CT aggregates [V6-Pyr] and [V7-Pyr] too exhibited decomposition pathways identical to [V1-Pyr] and [V2-Pyr] without a marked deviation (Figure S21, SI).

| [V1-Pyr] | Experimental (%) | Theoretically calculated (%) |       |
|----------|------------------|------------------------------|-------|
|          |                  | (1:1)                        | (3:2) |
| Carbon   | 57.33            | 56.15                        | 61    |
| Hydrogen | 5.21             | 5.17                         | 6.12  |
| Nitrogen | 3.75             | 3.19                         | 3.98  |
| Oxygen   | -                | 21.89                        | 19.74 |
| Sulphur  | -                | 10.96                        | 9.13  |

**Table S1** CHN analysis data of [V1-Pyr] CT aggregates, calculated for 1:1 and 3:2 aggregates of V1 and pyranine.

| [V2-Pyr] | Experimental (%) | Theoretically calculated (%) |       |
|----------|------------------|------------------------------|-------|
|          |                  | (1:1)                        | (3:2) |
| Carbon   | 58.82            | 57.50                        | 62.39 |
| Hydrogen | 5.14             | 5.59                         | 5.95  |
| Nitrogen | 3.53             | 3.04                         | 3.76  |
| Oxygen   | -                | 20.89                        | 18.63 |
| Sulphur  | -                | 10.46                        | 9.13  |

**Table S2** CHN analysis data of [V2-Pyr] CT aggregates, calculated for 1:1 and 3:2 aggregates of V2 and pyranine.

| [V6-Pyr] | Experimental (%) | Theoretically calculated (%) |       |
|----------|------------------|------------------------------|-------|
|          |                  | (1:1)                        | (3:2) |
| Carbon   | 60.41            | 56.15                        | 61    |
| Hydrogen | 5.47             | 5.17                         | 6.12  |
| Nitrogen | 3.82             | 3.19                         | 3.98  |
| Oxygen   | -                | 21.89                        | 19.74 |
| Sulphur  | -                | 10.97                        | 9.13  |

**Table S3** CHN analysis data of [V6-Pyr] CT aggregates, calculated for 1:1 and 3:2 aggregates of V6 and pyranine.

| [V7-Pyr] | Experimental (%) | Theoretically calculated (%) |       |
|----------|------------------|------------------------------|-------|
|          |                  | (1:1)                        | (3:2) |
| Carbon   | 60.27            | 57.50                        | 62.39 |
| Hydrogen | 5.62             | 5.59                         | 5.95  |
| Nitrogen | 3.63             | 3.04                         | 3.76  |
| Oxygen   | -                | 20.89                        | 18.63 |
| Sulphur  | -                | 10.46                        | 9.13  |

**Table S4** CHN analysis data of [V7-Pyr] CT aggregates, calculated for 1:1 and 3:2 aggregates of V7 and pyranine.

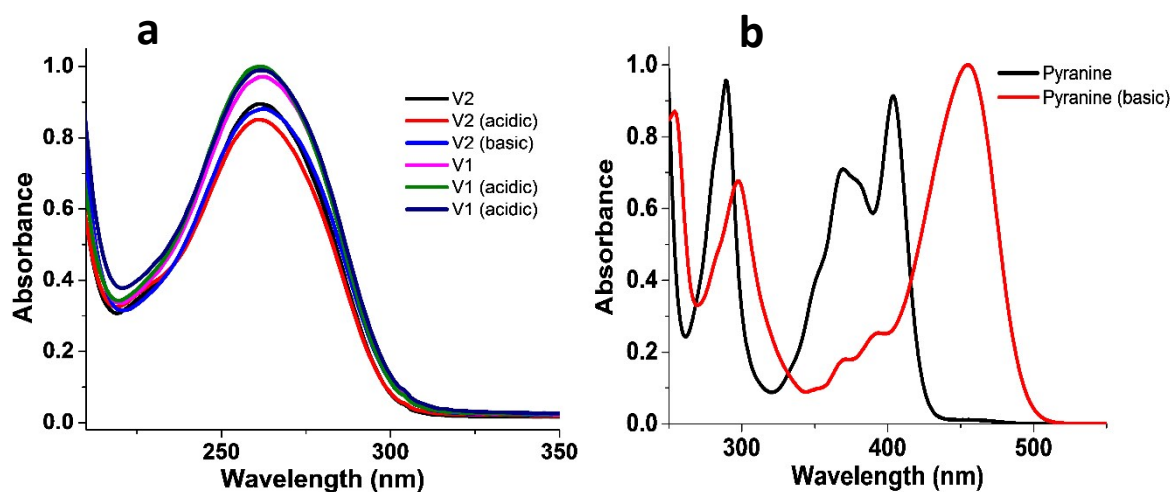

**Figure S23** pH dependent optical properties of (a) Viologen derivatives (V1, V2) at different pH conditions (acidic, pH = 1 and basic, pH = 13) and (b) Pyranine.

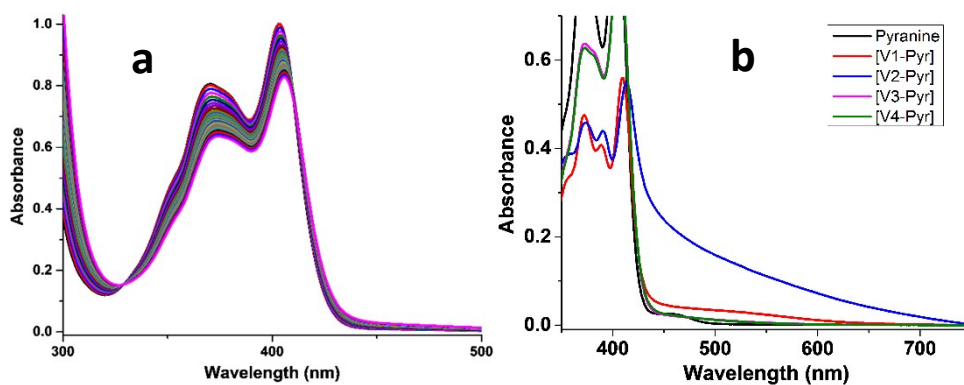

**Figure S24.** (a) Absorption spectra of 50  $\mu\text{M}$  pyranine upon stepwise addition of V3 (from 0  $\mu\text{M}$  to 120  $\mu\text{M}$ ). (b) Depiction of predominant Mie scattered absorbance for V2-Pyr and V1-Pyr.



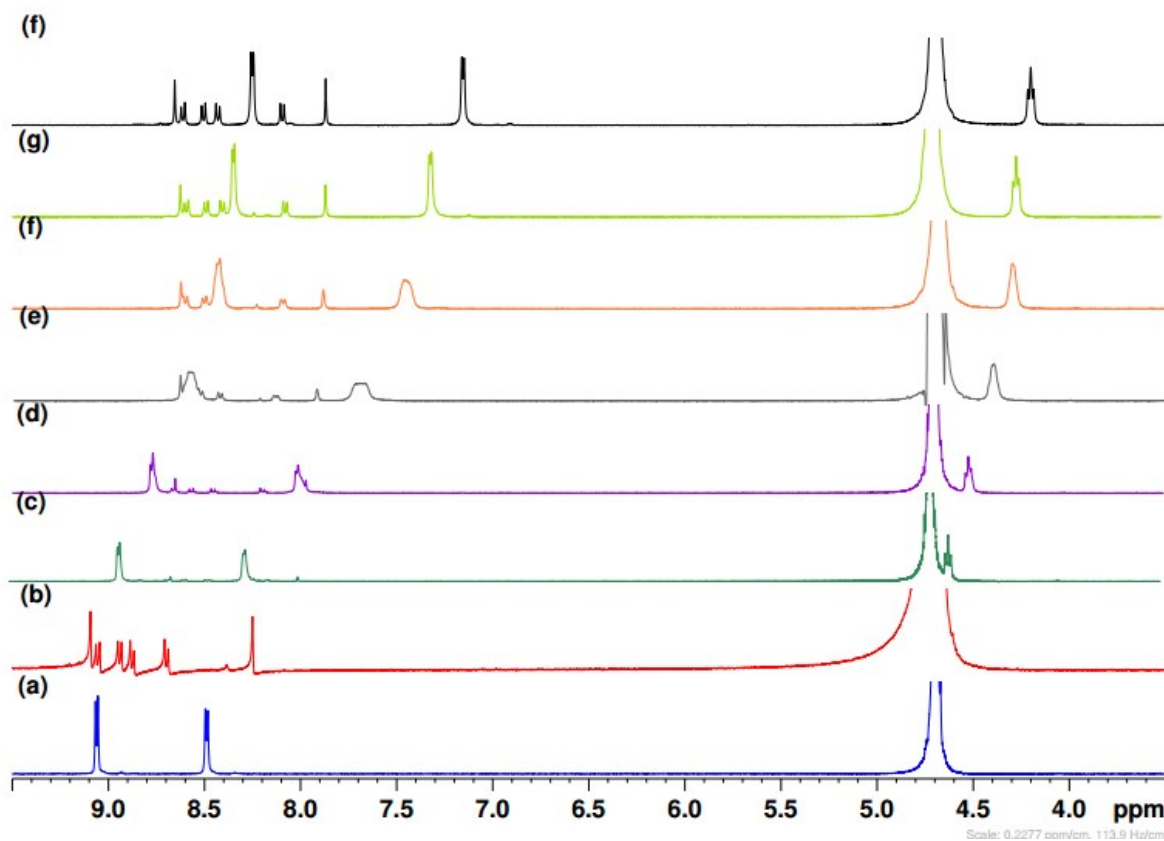

**Figure S25** NMR titration of V4 with pyranine in D<sub>2</sub>O: (a) V4, (b) Pyranine (pyr), (c) V4 + 0.25 eq. pyr, (d) V4 + 0.5 eq. pyr, (e) V4 + 0.75 eq. pyr, (f) V4 + 1 eq. pyr, (g) V4 + 1.25 eq. pyr, (h) V4 + 1.5 eq. pyr

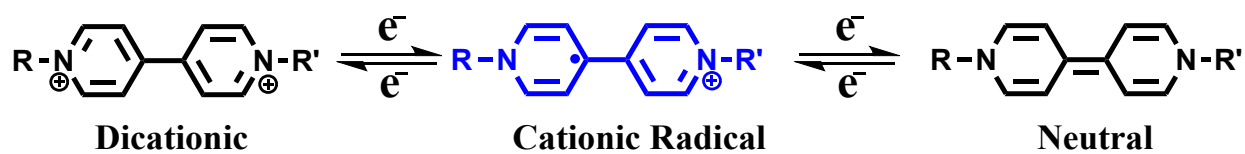

**Figure S26:** Redox reactions of viologens

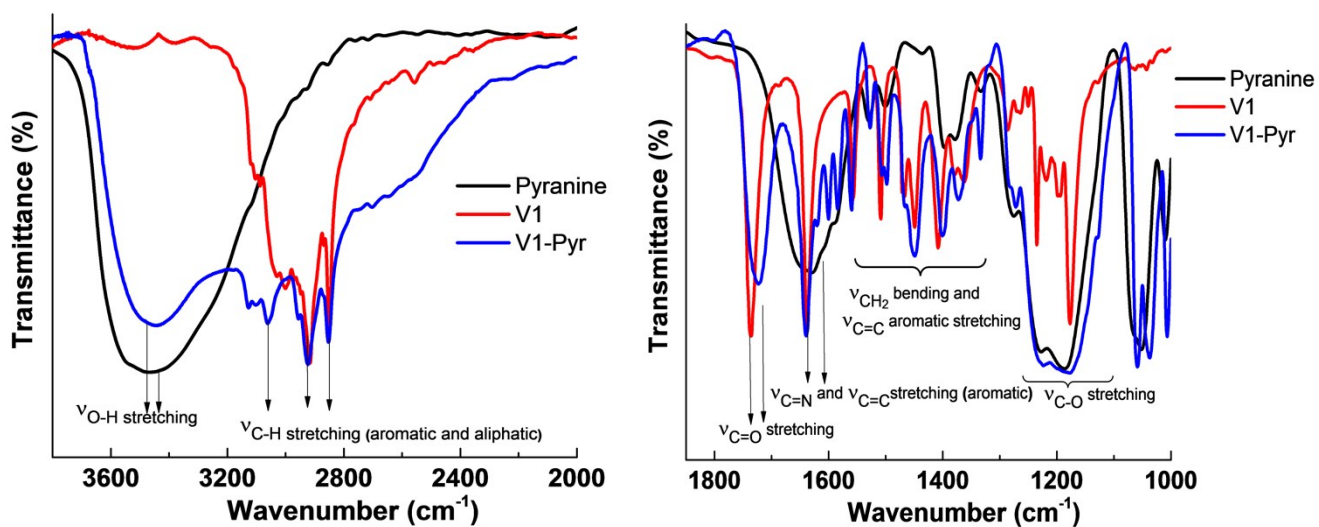

Figure S27: IR Spectra of V1, Pyranine and [V1-Pyr] aggregates.

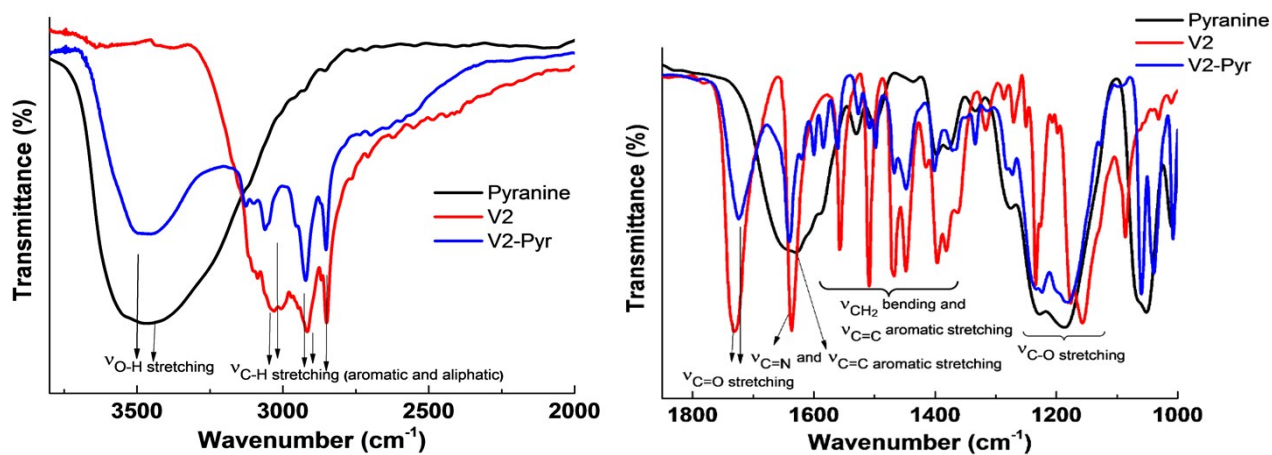

Figure S28: IR Spectra of V2, Pyranine and [V2-Pyr] aggregates.

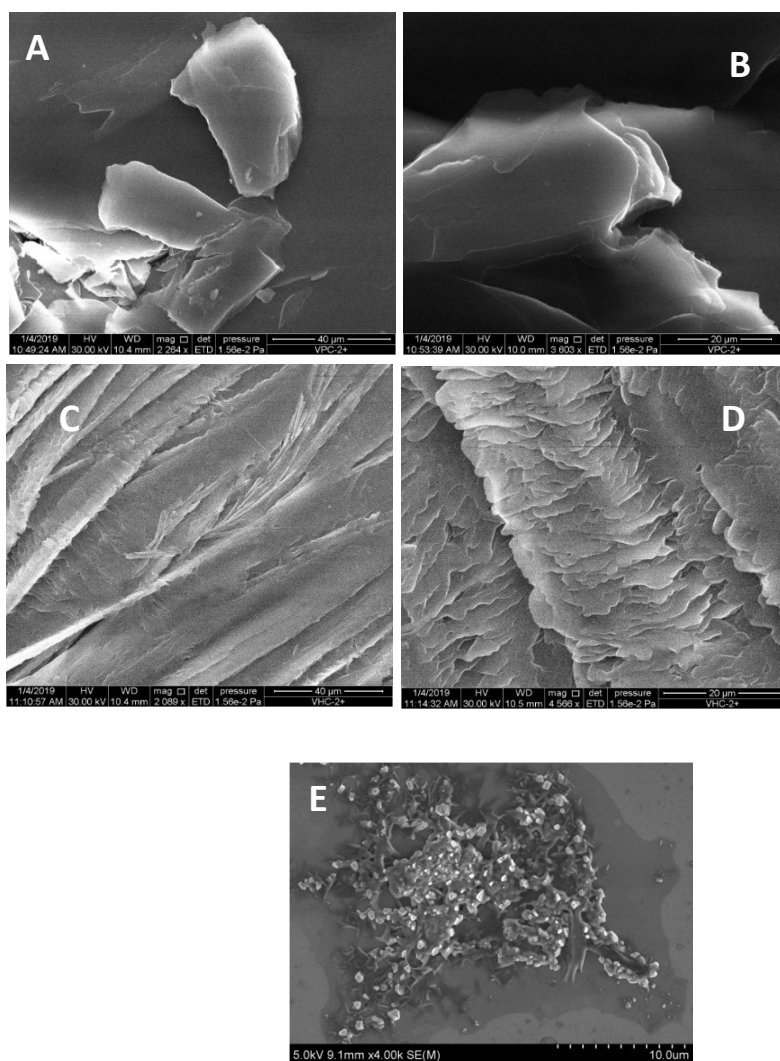

**Figure S29:** SEM Images of (A) and (B) - V1, (C) and (D) - V2, (E) – [V4-Pyr] CT complex

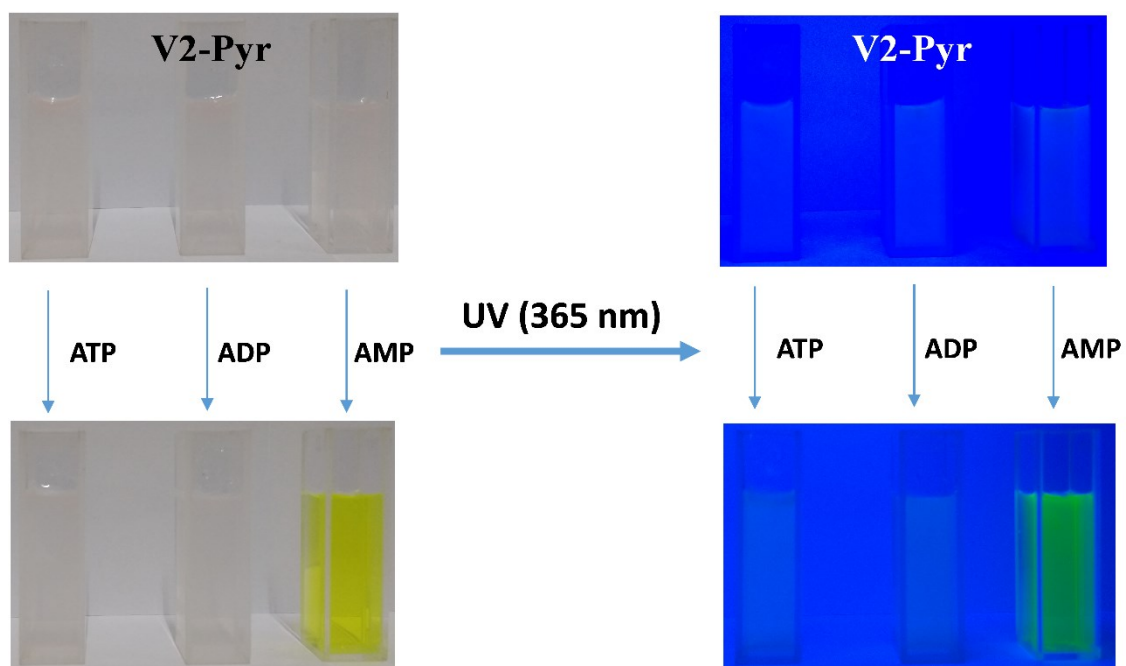

**Figure S30** Visual appearance of disaggregation induced recognition of AMP by [V2-Pyr] CT aggregates in water.

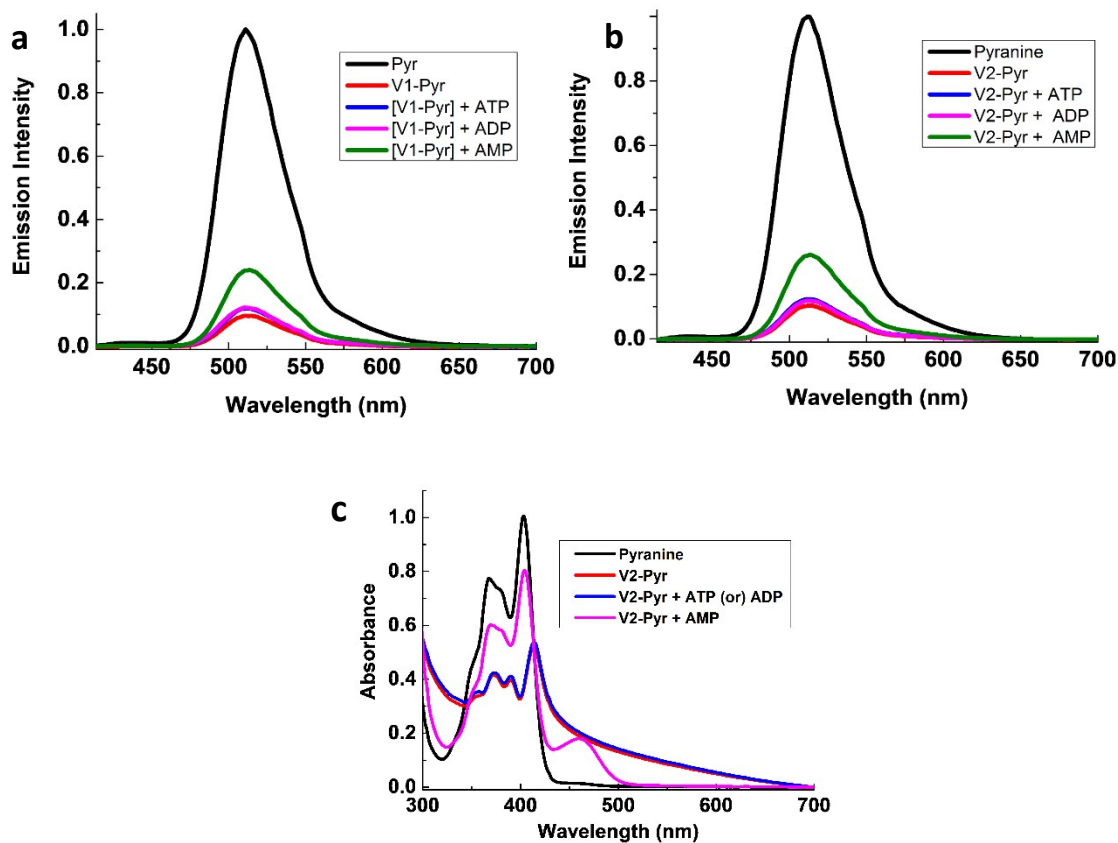

**Figure S31** Emission spectral response of (a) [V1-Pyr] and (b) [V2-Pyr] CT complex towards adenosine nucleotides in aqueous HEPES buffer (pH = 7.4). (In HEPES buffer, the aggregates dissolved giving rise to a clear solution). (c) Absorption spectra of [V2-Pyr] aggregates in presence of adenosine nucleotides.
